# Supplementary material for: No Ancient DNA Damage in Actinobacteria from the Neanderthal Bone
Source: PubMed Central journal article supplement (PMC3643900; doi:10.1371/journal.pone.0062799), 2013-05-03

### A Variation in fraction of Streptomyces: extract and re-extract subsets

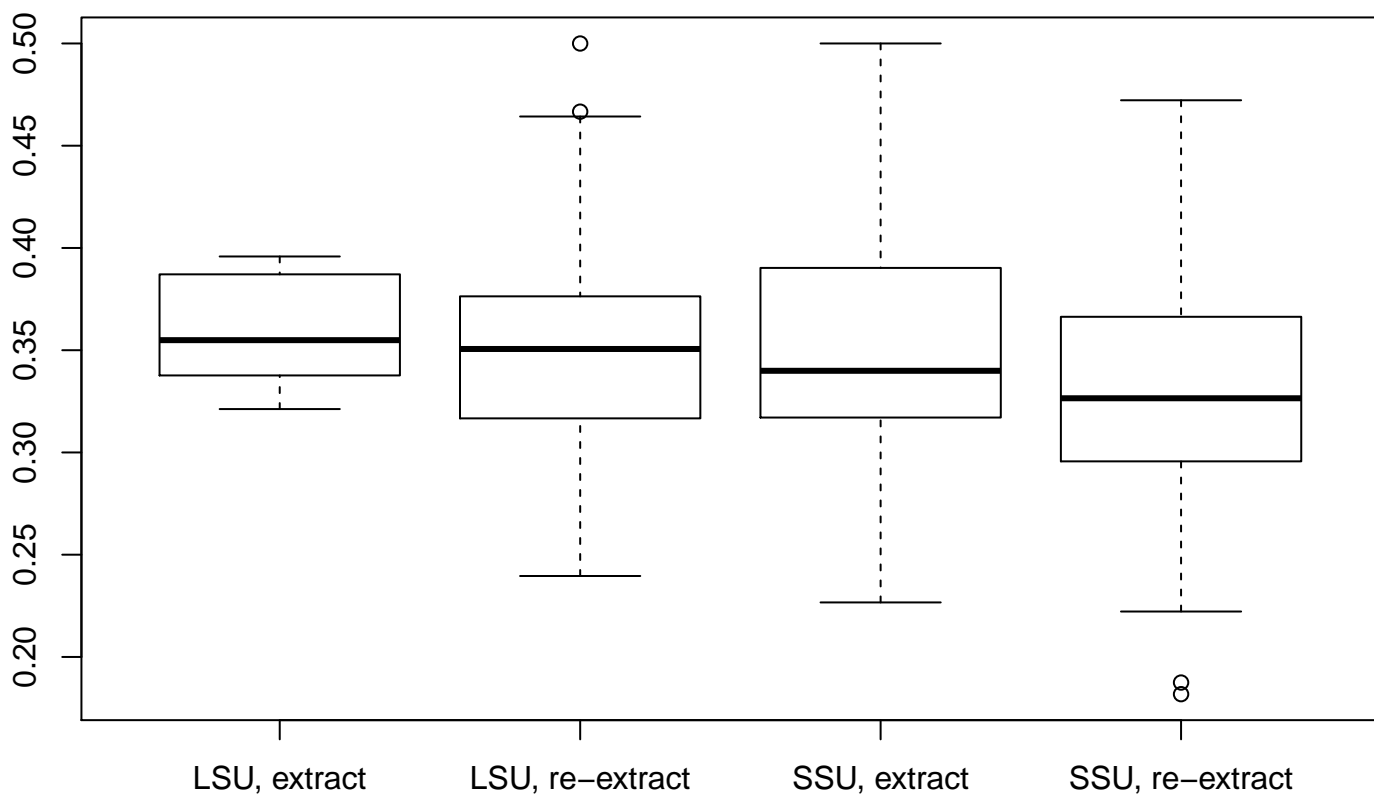

### B Variation in fraction of Streptomyces: short and long subsets

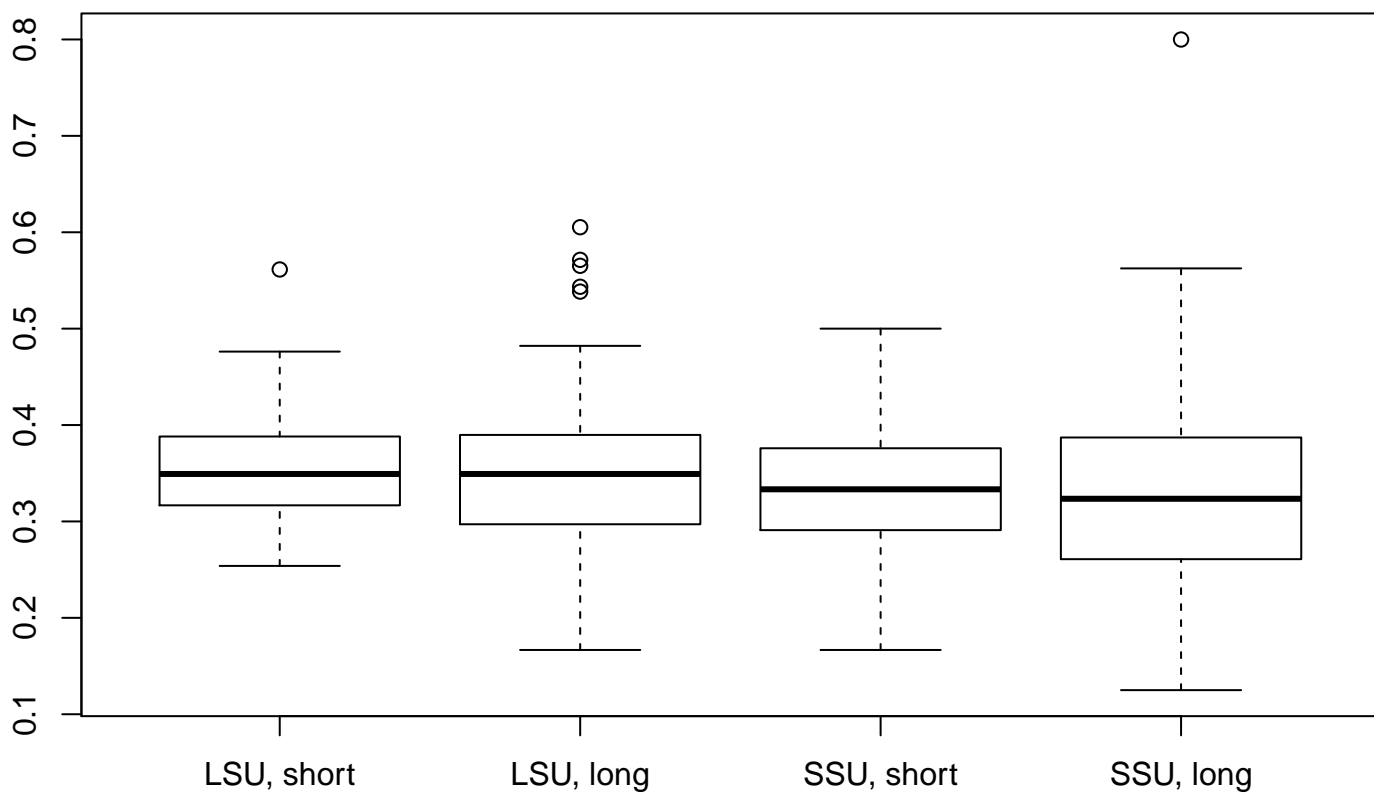

Supplement: pone.0062799.s002.pdf [file pone.0062799.s002.pdf]
