# Supplementary material for: No Ancient DNA Damage in Actinobacteria from the Neanderthal Bone
Source: PubMed Central journal article supplement (PMC3643900; doi:10.1371/journal.pone.0062799), 2013-05-03
Supplement: pone.0062799.s003.pdf [file pone.0062799.s003.pdf]

1 30

Scol  
Sgris  
SVit  
Strept\_C11  
A5\_G07  
u2\_C05  
u2\_C09  
u2\_C02  
u2\_C08

31 60

Scol  
Sgris  
SVit  
Strept\_C11  
A5\_G07  
u2\_C05  
u2\_C09  
u2\_C02  
u2\_C08

61 90

Scol  
Sgris  
SVit  
Strept\_C11  
A5\_G07  
u2\_C05  
u2\_C09  
u2\_C02  
u2\_C08

91 120

Scol  
Sgris  
SVit  
Strept\_C11  
A5\_G07  
u2\_C05  
u2\_C09  
u2\_C02  
u2\_C08

121 150

Scol  
Sgris  
SVit  
Strept\_C11  
A5\_G07  
u2\_C05  
u2\_C09  
u2\_C02  
u2\_C08

151 180

Scol  
Sgris  
SVit  
Strept\_C11  
A5\_G07  
u2\_C05  
u2\_C09  
u2\_C02  
u2\_C08

181 210

Scol  
Sgris  
SVit  
Strept\_C11  
A5\_G07  
u2\_C05  
u2\_C09  
u2\_C02  
u2\_C08

211 240

Scol  
Sgris  
SVit  
Strept\_C11  
A5\_G07  
u2\_C05  
u2\_C09  
u2\_C02  
u2\_C08

241 270

Scol  
Sgris  
SVit  
Strept\_C11  
A5\_G07  
u2\_C05  
u2\_C09  
u2\_C02  
u2\_C08

271 300

Scol  
Sgris  
SVit  
Strept\_C11  
A5\_G07  
u2\_C05  
u2\_C09  
u2\_C02  
u2\_C08

301 330

Scol  
Sgris  
SVit  
Strept\_C11  
A5\_G07  
u2\_C05  
u2\_C09  
u2\_C02  
u2\_C08

331 360

Scol  
Sgris  
SVit  
Strept\_C11  
A5\_G07  
u2\_C05  
u2\_C09  
u2\_C02  
u2\_C08

361 390  
Scol C G G A U A C U G A C C C U G C A G G C A U C U G G G A G  
Sgris C G G A U A A C A - C U C U G U C C C G C A U G G G A C G G  
SVit C G G A T A G C A T G C C T G G T - - - - -  
Strept\_C11 C G G A T A T G A C G G C T G G C C G C A T G G T C T G G G  
A5\_G07 - - - - -  
u2\_C05 T G G A T A G C A T G G G T G G T - - - - -  
u2\_C09 T G G A T A G C A T G G G T G G T - - - - -  
u2\_C02 C G G A T A G C A T G G T G G T - - - - -  
u2\_C08 T G G A T A G C A T G G T G G T - - - - -  
C G G A T A G C A T G T G G T

391 420  
Scol G U U C G A A A G C U C C G G C G G U G A A G G A U G A G C  
Sgris G G U U A A A A G C U C C G G C G G U G A A G G A U G A G C  
SVit G G T G G A A A G C T C C G G C G G T A C G A G A T G A G C  
Strept\_C11 C G T G G A A A G C T C C G G C G A T C T G G G A T G A G C  
A5\_G07 - - - - -  
u2\_C05 G G T G G A A A G T T C C G G C G G T A T G G G G T G G G C  
u2\_C09 G G T G G A A A G T T C C G G C G G T A T G G G G T G G G C  
u2\_C02 G G T G G A A A G T T T T - T C G G C T G G A G A T G G G C  
u2\_C08 G G T G G A A A G T T C C G G C G G T A T G G G G T G G G C  
G G T G G A A A G T C C G G C G G T G G G A T G G C

421 450  
Scol C C G C G G C C U A U C A G C U U G U U G G U G A G G U A A  
Sgris C C G C G G C C U A U C A G C U U G U U G G U G G G G U A A  
SVit C C G C G G C C T A T C A G C T T G T T G G T G G G G T G A  
Strept\_C11 C C G C G G C C T A T C A G C T T G T T G G T G G G G T G A  
A5\_G07 - C G G G C C T A T C A G C T T G T T G G T G A G G A A A  
u2\_C05 C C G C G G C C T A T C A G C T T G T T G G T G G G G T G A  
u2\_C09 C C G C G G C C T A T C A G C T T G T T G G T G G G G T G A  
u2\_C02 T C G G G C C T A T C A G C T T G T T G G T G G G G T G A  
u2\_C08 C C G C G G C C T A T C A G C T T G T T G G T G G G G T G A  
C C G C G G C C T A T C A G C T T G T T G G T G G G G T G A

451 480  
Scol U G G C U A C C A A G G C G A C G A C G G G U A G C C G G  
Sgris U G G C C U A C C A A G G C G A C G A C G G G U A G C C G G  
SVit T G C C T A C C A A G G C G A C G A C G G G T A G C C G G  
Strept\_C11 T G C C T A C C A A G G C G A C G A C G G G T A G C C G G  
A5\_G07 T G G C T C A C C A A G G C G A C G A C G G G T A G C C G G  
u2\_C05 T G C C T A C C A A G G C G A C G A C G G G T A G C C G G  
u2\_C09 T G C C T A C C A A G G C G A C G A C G G G T A G C C G G  
u2\_C02 T G C C C T A C C A A G G C G G G T G A C C G G T A G C C G G  
u2\_C08 T G C C C T A C C A A G G C G A C G A C G G G T A G C C G G  
T G C C C T A C C A A G G C G A C G A C G G G T A G C C G G

481 510  
Scol C C U G A G A G G G C G A C C G G C C A C A C U G G G A C U  
Sgris C C U G A G A G G G C G A C C G G C C A C A C U G G G A C U  
SVit C C T G A G A G G G C G A C C G G C C A C A C T G G G A C T  
Strept\_C11 C C T G A G A G G G C G A C C G G C C A C A C T G G G A C T  
A5\_G07 C C T G A G A G G G C G A C C G G C C A C A C T G G G A C T  
u2\_C05 C C T G A G A G G G C G A C C G G C C A C A C T G G G A C T  
u2\_C09 C C T G A G A G G G C G A C C G G C C A C A C T G G G A C T  
u2\_C02 C C T G A G A G G G C G A C C G G C C A C A C T G G G A C T  
u2\_C08 C C T G A G A G G G C G A C C G G C C A C A C T G G G A C T  
C C T G A G A G G G C G A C C G G C C A C A C T G G G A C T

511 540  
Scol G A G A C A C G G C C C A G A C U C C U A C G G G A G G C A  
Sgris G A G A C A C G G C C C A G A C U C C U A C G G G A G G C A  
SVit G A G A C A C G G C C C A G A C T C C T A C G G G A G G C A  
Strept\_C11 G A G A C A C G G C C C A G A C T C C T A C G G G A G G C A  
A5\_G07 G A G A C A C G G C C C A G A C T C C T A C G G G A G G C A  
u2\_C05 G A G A C A C G G C C C A G A C T C C T A C G G G A G G C A  
u2\_C09 G A G A C A C G G C C C A G A C T C C T A C G G G A G G C A  
u2\_C02 G A G C A C G G C C C A G A C T C C T A C G G G A G G C A  
u2\_C08 G A G A C A C G G C C C A G A C T C C T A C G G G A G G C A  
G A G A C A C G G C C C A G A C T C C T A C G G G A G G C A

541 570  
Scol G C A G U G G G G A A U A U U G C A C A A U G G G G A A A  
Sgris G C A G U G G G G A A U A U U G C A C A A U G G G G A A A  
SVit G C A G T G G G G A A T A T T G C A C A A T G G G C G C A A  
Strept\_C11 G C A G T G G G G A A T A T T G C A C A A T G G G C G C A A  
A5\_G07 G C A G T G G G G A A T A T T G C A C A A T G G G C G C A A  
u2\_C05 G C A G T G G G G A A T A T T G C A C A A T G G G C G C A A  
u2\_C09 G C A G T G G G G A A T A T T G C A C A A T G G G C G C A A  
u2\_C02 G C A G T G G G G A A T A T T G C A C A A T G G A C G A A A  
u2\_C08 G C A G T G G G G A A T A T T G C A C A A T G G G C G C A A  
G C A G T G G G G A A T A T T G C A C A A T G G G C G C A A

571 600  
Scol C C C U G A U G C A G C G A C G C C G C G U G A G G G A U G  
Sgris G C C U G A U G C A G C G A C G C C G C G U G A G G G A U G  
SVit G C C T G A T G C A G C G A C G C C G G T G A G G G A T G  
Strept\_C11 G C C T G A T G C A G C G A C G C C G G T G A G G G A T G  
A5\_G07 G C C T G A T G C A G C G A C G C C G G T G A G G G A T G  
u2\_C05 G C C T G A T G C A G C G A C G C C G G T G A G G G A T G  
u2\_C09 G C C T G A T G C A G C G A C G C C G G T G A G G G A T G  
u2\_C02 G T C T G A T G C A G C G A C G C C G G T G A G G G A T G  
u2\_C08 G C C T G A T G C A G C G A C G C C G G T G A G G G A T G  
G C C T G A T G C A G C G A C G C C G G T G A G G G A T G

601 630  
Scol A C G G C C U U C G G G U U G U A A A C C U C U U U C A G C  
Sgris A C G G C C U U C G G G U U G U A A A C C U C U U U C A G C  
SVit A C G G C C T T C G G G T T G T A A A C C T C T T T C A G C  
Strept\_C11 A C G G C C T T C G G G T T G T A A A C C T C T T T C A G C  
A5\_G07 A C G G C C T T C G G G T T G T A A A C C T C T T T C A G C  
u2\_C05 A C G G C C T T C G G G T T G T A A A C C T C T T T C A C C  
u2\_C09 A C G G C C T T C G G G T T G T A A A C C T C T T T C A C C  
u2\_C02 A C G G C C T T C G G G T T G T A A A C C T C T T T C G C C  
u2\_C08 A C G G C C T T C G G G T T G T A A A C C T C T T T C A C C  
A C G G C C T T C G G G T T G T A A A C C T C T T T C A G C

631 660  
Scol A G G G A A G A A G C G A - - - - - A A G  
Sgris A G G G A A G A A G C G A - - - - - G A G  
SVit A G G A A G A A G C C T T G G C C T T T T G G T T G G G  
Strept\_C11 A G G A A G A A G C G C - - - - - A A G  
A5\_G07 A G G A A G A A G C G A - - - - - A A G  
u2\_C05 G C C G A C G A A G C G A - - - - - G A G  
u2\_C09 G C C G A C G A A G C G A - - - - - G A G  
u2\_C02 C G G A A C G A A G C G A - - - - - G A G  
u2\_C08 G C C G A C G A A G C G A - - - - - G A G  
A G G A A G A A G C G A G A G G A G A G

661 690  
Scol U G A C G G U A C C U G C A G A A G A A G C C C G G C U A  
Sgris U G A C G G U A C C U G C A G A A G A A G C C C G G C U A  
SVit T G A C G G T A C C T G C A G A A G A A G C A C C G G C T A  
Strept\_C11 T G A C G G T A C C T G C A G A A G A A G C A C C G G C T A  
A5\_G07 T G A C G G T A C C T G C A G A A G A A G C C C G G C T A  
u2\_C05 T G A C G G T A G G C G G G G A A G A A G C A C C G G C T A  
u2\_C09 T G A C G G T A G C C G G G G A A G A A G C A C C G G C T A  
u2\_C02 T G A C G G T A C C G G G A T A A G A A G C A C C G G C T A  
u2\_C08 T G A C G G T A G G C G G G G A A G A A G C A C C G G C T A  
T G A C G G T A C C G C A G A A G A A G C A C C G G C T A

691 720  
Scol A C U A C G U G C C A G C A G C C G C G G U A A U A C G U A  
Sgris A C U A C G U G C C A G C A G C C G C G G U A A U A C G U A  
SVit A C T A C G T G C C A G C A G C C G C G T A A T A C G T A  
Strept\_C11 A C T A C G T G C C A G C A G C C G C G T A A T A C G T A  
A5\_G07 A C T A C G T G C C A G C A G C C G C G T A A T A C G T A  
u2\_C05 A C T A C G T G C C A G C A G C C G C G T A A T A C G T A  
u2\_C09 A C T A C G T G C C A G C A G C C G C G T A A T A C G T A  
u2\_C02 A C T A C G T G C C A G C A G C C G C G T A A T A C G T A  
u2\_C08 A C T A C G T G C C A G C A G C C G C G T A A T A C G T A  
A C T A C G T G C C A G C A G C C G C G T A A T A C G T A

721 750  
Scol GGGCGCAAAGCGUUGUCCGGAUUUAUUGGGC  
Sgris GGGCGCAAAGCGUUGUCCGGAUUUAUUGGGC  
SVit GGGTGGGAGCAATTGTCGGAAATTAATTGGGC  
Strept\_C11 GGGTGGGAGCAATTGTCGGAAATTAATTGGGC  
A5\_G07 GGGCGCAAAGCGTTGTCGGAAATTAATTGGGC  
u2\_C05 GGGTGGGAGCAATTGTCGGAAATTAATTGGGC  
u2\_C09 GGGTGGGAGCAATTGTCGGAAATTAATTGGGC  
u2\_C02 GGGTGGGAGCAATTGTCGGAAATTAATTGGGC  
u2\_C08 GGGTGGGAGCAATTGTCGGAAATTAATTGGGC

751 780  
Scol GUAAAAGAGCUUGUAGGCGGGCUUGUCACGUC  
Sgris GUAAAAGAGCUUGUAGGCGGGCUUGUCACGUC  
SVit GTAAAAGAGCTCGTAAGCGGGCTTGTCGGGTC  
Strept\_C11 GTAAAAGAGCTCGTAAGCGGGCTTGTCGGGTC  
A5\_G07 GTAAAAGAGCTCGTAAGCGGGCTTGTCACGTC  
u2\_C05 GTAAAAGAGCTCGTAAGCGGGTTTGTCGGGTC  
u2\_C09 GTAAAAGAGCTCGTAAGCGGGTTTGTCGGGTC  
u2\_C02 GTAAAAGAGCTCGTAAGCGGGTTTGTCGGGTC  
u2\_C08 GTAAAAGAGCTCGTAAGCGGGTTTGTCGGGTC

781 810  
Scol GGUUGUGAAAAGCCC - GGGGCUUAAACCCGG  
Sgris GGUUGUGAAAAGCCC - GGGGCUUAAACCCGG  
SVit GGAATGTAAAAGCCC - GGGGCTTAAACCCGG  
Strept\_C11 GGAATGTAAAAGCCC GGGGCTTAAACCCGG  
A5\_G07 GGGTGTAAAAGACC - GGGGCTTAAACCCGG  
u2\_C05 GGCCTGTAAAAGCCT - ACCGCTTAAACCCGG  
u2\_C09 GGCCTGTAAAAGCCT - ACCGCTTAAACCCGG  
u2\_C02 TGCCTGTAAAAGCCT - GGGGCTTAAACCCGG  
u2\_C08 GGCCTGTAAAAGCCT - ACCGCTTAAACCCGG

811 840  
Scol GUCUGCAUGUCGAUACGGGCAAGCUAGAUGU  
Sgris GUCUGCAUUCGAUACGGGCAAGCUAGAUGU  
SVit GTCGTGCATTCGATACGGGCAAGCTAGAGTT  
Strept\_C11 GTCGTGCATTCGATACGGGCAAGCTAGAGTT  
A5\_G07 TTCGTGCATTCGATACGGGCAAGCTAGAGTT  
u2\_C05 GCGTGGGTCGATACGGGCAAGACTTAGAGTT  
u2\_C09 GCGTGGGTCGATACGGGCAAGACTTAGAGTT  
u2\_C02 GCTTGGGTCGATACCTGGGCAAGACTTAGAGTT  
u2\_C08 GCGTGGGTCGATACGGGCAAGACTTAGAGTT

841 870  
Scol CCGUAAGGGGAAGUCCGAAUCCUGUGUAG  
Sgris UGGUAAGGGGAAGUCCGAAUCCUGUGUAG  
SVit CCGTAAGGGGAAGCTGGAAATTCCTGGTGA  
Strept\_C11 CCGTAAGGGGAAGCTGGAAATTCCTGGTGA  
A5\_G07 TGGTAAGGGGAAGATCGAAATTCCTGGTGA  
u2\_C05 CCGTAAGGGGAAGCTGGAAATTCCTGGTGA  
u2\_C09 CCGTAAGGGGAAGCTGGAAATTCCTGGTGA  
u2\_C02 CCGTAAGGGGAAGCTGGAAATTCCTGGTGA  
u2\_C08 CCGTAAGGGGAAGCTGGAAATTCCTGGTGA

871 900  
Scol CCGUGAAAUGGGCAGAUUAUCAGGAGGAACA  
Sgris CCGUGAAAUGGGCAGAUUAUCAGGAGGAACA  
SVit CCGTGAATAAGGCAGATATCAGGAGGAACA  
Strept\_C11 CCGTGAATAAGGCAGATATCAGGAGGAACA  
A5\_G07 CCGTGAATAAGGCAGATATCAGGAGGAACA  
u2\_C05 CCGTGAATAAGGCAGATATCAGGAGGAACA  
u2\_C09 CCGTGAATAAGGCAGATATCAGGAGGAACA  
u2\_C02 CCGTGAATAAGGCAGATATCAGGAGGAACA  
u2\_C08 CCGTGAATAAGGCAGATATCAGGAGGAACA

901 930  
Scol CCGGUUGGGGAAAGGCGGAUCUCUGGGCCGAU  
Sgris CCGGUUGGGGAAAGGCGGAUCUCUGGGCCAU  
SVit CCGGTGGGGAAGGGGGTCTCTGGGCGGAT  
Strept\_C11 CCGGTGGGGAAGGGGGTCTCTGGGCGGAT  
A5\_G07 CCGGTGGGGAAGGGGGTCTCTGGGCCGAT  
u2\_C05 CCGGTGGGGAAGGGGGTCTCTGGGCGGAT  
u2\_C09 CCGGTGGGGAAGGGGGTCTCTGGGCGGAT  
u2\_C02 CCGGTGGGGAAGGGGGTCTCTGGGCGGAT  
u2\_C08 CCGGTGGGGAAGGGGGTCTCTGGGCGGAT

931 960  
Scol ACUGACGCUAGGAGAGCGAAAAGCGUGGGGAG  
Sgris ACUGACGCUAGGAGAGCGAAAAGCGUGGGGAG  
SVit ACTGACGCTGAGGAGCGAAAAGCGTGGGGA  
Strept\_C11 ACTGACGCTGAGGAGCGAAAAGCGTGGGGA  
A5\_G07 ACTGACGCTGAGGAGCGAAAAGCGTGGGGA  
u2\_C05 ACTGACGCTGAGGAGCGAAAAGCGTGGGGA  
u2\_C09 ACTGACGCTGAGGAGCGAAAAGCGTGGGGA  
u2\_C02 ACTGACGCTGAGGAGCGAAAAGCGTGGGGA  
u2\_C08 ACTGACGCTGAGGAGCGAAAAGCGTGGGGA

961 990  
Scol CGAACAGGAUUAAGUAACCCUGGUAGUCCAC  
Sgris CGAACAGGAUUAAGUAACCCUGGUAGUCCAC  
SVit CGAACAGGATTAAGATAACCTTGGTAGTCCAC  
Strept\_C11 CGAACAGGATTAAGATAACCTTGGTAGTCCAC  
A5\_G07 CGAACAGGATTAAGATAACCTTGGTAGTCCAC  
u2\_C05 CGAACAGGATTAAGATAACCTTGGTAGTCCAC  
u2\_C09 CGAACAGGATTAAGATAACCTTGGTAGTCCAC  
u2\_C02 CGAACAGGATTAAGATAACCTTGGTAGTCCAC  
u2\_C08 CGAACAGGATTAAGATAACCTTGGTAGTCCAC

991 1020  
Scol GCCGUAAAAGGUGGGCACUAAGUGUGGGCA  
Sgris GCCGUAAAAGGUGGGCACUAAGUGUGGGCA  
SVit GCCGTAAAAGGTTGGGAACCTAGGTGTGGCG  
Strept\_C11 GCCGTAAAAGGTTGGGAACCTAGGTGTGGCG  
A5\_G07 GCCGTAAAAGGTTGGGAACCTAGGTGTGGCG  
u2\_C05 GCTGTAAAAGGTTGGGGCTAGGTGTGGGTG  
u2\_C09 GCTGTAAAAGGTTGGGGCTAGGTGTGGGTG  
u2\_C02 GCTGTAAAAGGTTGGGGCTAGGTGTGGGTG  
u2\_C08 GCTGTAAAAGGTTGGGGCTAGGTGTGGGTG

1021 1050  
Scol ACAUUCACAGUUGUCCGUGCCGCAAGCUAAC  
Sgris ACAUUCACAGUUGUCCGUGCCGCAAGCUAAC  
SVit ACATTCCACGTTGTCCGTGCCGTAAGCTAAC  
Strept\_C11 ACATTCCACGTTGTCCGTGCCGTAAGCTAAC  
A5\_G07 ACATTCCACGTTGTCCGTGCCGTAAGCTAAC  
u2\_C05 ACATTCCACGTTGTCCGTGCCGTAAGCTAAC  
u2\_C09 ACATTCCACGTTGTCCGTGCCGTAAGCTAAC  
u2\_C02 ACATTCCACGTTGTCCGTGCCGTAAGCTAAC  
u2\_C08 ACATTCCACGTTGTCCGTGCCGTAAGCTAAC

1051 1080  
Scol GCAUUAAGUG - CCCGCGCU GGGGAGUJACGG  
Sgris GCAUUAAGUG - CCCGCGCU GGGGAGUJACGG  
SVit GCATTAAAGTT - CCCCGCTTGGGAGTACGG  
Strept\_C11 GCATTAAAGTT - CCCCGCTTGGGAGTACGG  
A5\_G07 GCATTAAAGTT - CCCCGCTTGGGAGTACGG  
u2\_C05 GCATTAAAGG - CCCCGCTTGGGAGTACGG  
u2\_C09 GCATTAAAGG - CCCCGCTTGGGAGTACGG  
u2\_C02 GCATTAAAGG - CCCCGCTTGGGAGTACGG  
u2\_C08 GCATTAAAGG - CCCCGCTTGGGAGTACGG

1081 1110

Scol  
Sgris  
SVit  
Strept\_C11  
A5\_G07  
u2\_C05  
u2\_C09  
u2\_C02  
u2\_C08

1111 1140

Scol  
Sgris  
SVit  
Strept\_C11  
A5\_G07  
u2\_C05  
u2\_C09  
u2\_C02  
u2\_C08

1141 1170

Scol  
Sgris  
SVit  
Strept\_C11  
A5\_G07  
u2\_C05  
u2\_C09  
u2\_C02  
u2\_C08

1171 1200

Scol  
Sgris  
SVit  
Strept\_C11  
A5\_G07  
u2\_C05  
u2\_C09  
u2\_C02  
u2\_C08

1201 1230

Scol  
Sgris  
SVit  
Strept\_C11  
A5\_G07  
u2\_C05  
u2\_C09  
u2\_C02  
u2\_C08

1231 1260

Scol  
Sgris  
SVit  
Strept\_C11  
A5\_G07  
u2\_C05  
u2\_C09  
u2\_C02  
u2\_C08

1261 1290

Scol  
Sgris  
SVit  
Strept\_C11  
A5\_G07  
u2\_C05  
u2\_C09  
u2\_C02  
u2\_C08

1291 1320

Scol  
Sgris  
SVit  
Strept\_C11  
A5\_G07  
u2\_C05  
u2\_C09  
u2\_C02  
u2\_C08

1321 1350

Scol  
Sgris  
SVit  
Strept\_C11  
A5\_G07  
u2\_C05  
u2\_C09  
u2\_C02  
u2\_C08

1351 1380

Scol  
Sgris  
SVit  
Strept\_C11  
A5\_G07  
u2\_C05  
u2\_C09  
u2\_C02  
u2\_C08

1381 1410

Scol  
Sgris  
SVit  
Strept\_C11  
A5\_G07  
u2\_C05  
u2\_C09  
u2\_C02  
u2\_C08

1411 1440

Scol  
Sgris  
SVit  
Strept\_C11  
A5\_G07  
u2\_C05  
u2\_C09  
u2\_C02  
u2\_C08

1441 1470  
 Scol G C C G G U A C A A U G A G C U G C G A U A C C G C A A G G  
 Sgris G C C G G U A C A A U G A G C U G C G A U G C C G C G A G G  
 SVit G C C G G T A C A G T G A G C T G C G A T A C C G T G A G G  
 StrepT\_C11 G C C G G T A C A A T G A G C T G C G A T A C C G T G A G G  
 A5\_G07  
 u2\_C05 G C T G G T A C A G T G G G T T G C G A T A C C G T G A G G  
 u2\_C09 G C T G G T A C A G T G G G T T G C G A T A C C G T G A G G  
 u2\_C02 G C T G G T A C A G A G G G T T G C G A T A C C G C G A G G  
 u2\_C08 G C T G G T A C A G T G G G T T G C G A T A C C G T G A G G  
 G C G G T A C A G T G G T G C G A T A C C G T G A G G

1471 1500  
 Scol U G G A G C G A A U C U C A A A A A G C C G G U C U C A G U  
 Sgris C G G A G C G A A U C U C A A A A A G C C G G U C U C A G U  
 SVit T G G A G C G A A T C T C T A A A A A G C C G G T C T C A G T  
 StrepT\_C11 T G G A G C G A A T C T C A A A A A G C C G G T C T C A G T  
 A5\_G07  
 u2\_C05 T G G A G C G A A T C C C T G A A A G C T G G T C T C A G T  
 u2\_C09 T G G A G C G A A T C C C T G A A A G C T G G T C T C A G T  
 u2\_C02 T G G A G C G A A T C C C T G A A A G C C G G T C T C A G T  
 u2\_C08 T G G A G C G A A T C C C T G A A A G C T G G T C T C A G T  
 T G G A G C G A A T C C T A A A G C C G G T C T C A G T

1501 1530  
 Scol U C G G A U U G G G G U C U G C A A C U C G A C C C C A U G  
 Sgris U C G G A U U G G G G U C U G C A A C U C G A C C C C A U G  
 SVit T C G G A T T G G G G T C T G C A A C T C G A C C C C A T G  
 StrepT\_C11 T C G G A T T G G G G T C T G C A A C T C G A C C C C A T G  
 A5\_G07  
 u2\_C05 T C G G A T T G G C A G T C T G C A A C T C G A C T G C G T G  
 u2\_C09 T C G G A T T G G C A G T C T G C A A C T C G A C T G C G T G  
 u2\_C02 T C G G A T T G G T A G T C T G C A A C T C G A C T G C G T G  
 u2\_C08 T C G G A T T G G C A G T C T G C A A C T C G A C T G C G T G  
 T C G G A T T G G T C T G C A A C T C G A C C C C A T G

1531 1560  
 Scol A A G U C G G A G U G C U A G U A A U C G C A G A U C A G  
 Sgris A A G U C G G A G U G C U A G U A A U C G C A G A U C A G  
 SVit A A G T C G G A G T C T C T A G T A A T C G C A G A T C A G  
 StrepT\_C11 A A G T C G G A G T C T C T A G T A A T C G C A G A T C A G  
 A5\_G07  
 u2\_C05 A A G T C G G A G T C G C T A G T A A T C G C A G A T C A G  
 u2\_C09 A A G T C G G A G T C G C T A G T A A T C G C A G A T C A G  
 u2\_C02 A A G T C G G A G T C G C T A G T A A T C G C A G A T C A G  
 u2\_C08 A A G T C G G A G T C G C T A G T A A T C G C A G A T C A G  
 A A G T C G G A G T C G C T A G T A A T C G C A G A T C A G

1561 1590  
 Scol C A U U G C U G C G G U G A A U A C G U U C C C G G G C C U  
 Sgris C A U U G C U G C G G U G A A U A C G U U C C C G G G C C U  
 SVit C A T T G C T G C G G T G A A T A C G T T C C C G G G C C T  
 StrepT\_C11 C A T T G C T G C G G T G A A T A C G T T C C C G G G C C T  
 A5\_G07  
 u2\_C05 C A A C G C T G C G G T G A A T A C G T T C C C G G G C C T  
 u2\_C09 C A A C G C T G C G G T G A A T A T G T T C C C G G G C C T  
 u2\_C02 C A A C G C T G C G G T G A A T A C G T T C C C G G G C C T  
 u2\_C08 C A A C G C T G C G G T G A A T A C G T T C C C G G G C C T  
 C A G C T G C G G T G A A T A C G T T C C C G G G C C T

1591 1620  
 Scol U G U A C A C A C C G C C C G U C A C G U C A C G A A A G U  
 Sgris U G U A C A C A C C G C C C G U C A C G U C A C G A A A G U  
 SVit T G T A C A C A C C G C C C G T C A C G T C A C G A A A G T  
 StrepT\_C11 T G T A C A C A C C G C C C G T C A C G T C A C G A A A G T  
 A5\_G07  
 u2\_C05 T G T A C A C A C C G C C C G T C A C G T C A T G A A A G T  
 u2\_C09 T G T A C A C A C C G C C C G T C A C G T C A C G A A A G T  
 u2\_C02 T G T A C A C A C C G C C C G T C A C G T C A C G A A A G T  
 u2\_C08 T G T A C A C A C C G C C C G T C A C G T C A C G A A A G T  
 T G T A C A C A C C G C C C G T C A C G T C A C G A A A G T

1621 1650  
 Scol C G G U A A C A C C C G A A G C C G G - - - - U G G C C C  
 Sgris C G G U A A C A C C C G A A G C C G G - - - - U G G C C C  
 SVit C G G T A A C A C C C G A A G C C G G  
 StrepT\_C11 C G G T A A C A C C C G A A G C C G G T G G C C C C A A C C  
 A5\_G07  
 u2\_C05 C G G T A A C A C C C G A A G C C C A  
 u2\_C09 C G G T A A C A C C C G A A G C C C A  
 u2\_C02 C G G T A A C A C C C G A A G C C C A  
 u2\_C08 C G G T A A C A C C C G A A G C C C A  
 C G G T A A C A C C C G A A G C C

1651 1680  
 Scol A A C C C C U U G U G G G A G G A G C U G U C G A A G G U  
 Sgris A A C C C C U U G U G G G A G G G A G C U G U C G A A G G U  
 SVit A C A C T C G T G G T G G G G G A G C C G T C G A A G G T  
 StrepT\_C11 A C A C T C G T G G T G G G G G A G C C G T C G A A G G T  
 A5\_G07  
 u2\_C05  
 u2\_C09  
 u2\_C02  
 u2\_C08

1681 1710  
 Scol G G G A C U G G C G A U U G G G A C G A A G U C G U A A C A  
 Sgris G G G A C U G G C G A U U G G G A C G A A G U C G U A A C A  
 SVit G G G A C C A G C G A T T G G G A C G A A G T C G T A A C A  
 StrepT\_C11 G G G A C C A G C G A T T G G G A C G A A G T C G T A A C A  
 A5\_G07  
 u2\_C05  
 u2\_C09  
 u2\_C02  
 u2\_C08

1711 1740  
 Scol A G G U A G C C G U A C C G G A A G G U G G G - - - -  
 Sgris A G G U A G C C G U A C C G G A A G G U G C G G C U G G A U  
 SVit A G G T A G C C G T A C C G G A A G G T G C G G G T G G A T  
 StrepT\_C11 A G G T A G C C G T A C C G G A A G G T G C G G G T G G A T  
 A5\_G07  
 u2\_C05  
 u2\_C09  
 u2\_C02  
 u2\_C08

1741 1770  
 Scol  
 Sgris C A C C U C C U U U C U A A G G A  
 SVit  
 StrepT\_C11 C A C C T C C T T T C T A A G G A G C A C A T A G C C A G C  
 A5\_G07  
 u2\_C05  
 u2\_C09  
 u2\_C02  
 u2\_C08

1771 1800  
 Scol  
 Sgris  
 SVit  
 StrepT\_C11 C C G G A G C G A A C G T C T C C G G G T G G T T G C T C A  
 A5\_G07  
 u2\_C05  
 u2\_C09  
 u2\_C02  
 u2\_C08

1801 1830

Scol  
Sgris  
SVit  
Strept\_C11  
A5\_G07  
u2\_C05  
u2\_C09  
u2\_C02  
u2\_C08

1831 1860

Scol  
Sgris  
SVit  
Strept\_C11  
A5\_G07  
u2\_C05  
u2\_C09  
u2\_C02  
u2\_C08

1861 1890

Scol  
Sgris  
SVit  
Strept\_C11  
A5\_G07  
u2\_C05  
u2\_C09  
u2\_C02  
u2\_C08

1891 1920

Scol  
Sgris  
SVit  
Strept\_C11  
A5\_G07  
u2\_C05  
u2\_C09  
u2\_C02  
u2\_C08

1921 1950

Scol  
Sgris  
SVit  
Strept\_C11  
A5\_G07  
u2\_C05  
u2\_C09  
u2\_C02  
u2\_C08

1951 1962

Scol  
Sgris  
SVit  
Strept\_C11  
A5\_G07  
u2\_C05  
u2\_C09  
u2\_C02  
u2\_C08
