# Supplementary material for: No Ancient DNA Damage in Actinobacteria from the Neanderthal Bone
Source: PubMed Central journal article supplement (PMC3643900; doi:10.1371/journal.pone.0062799), 2013-05-03

### A collagenases M09

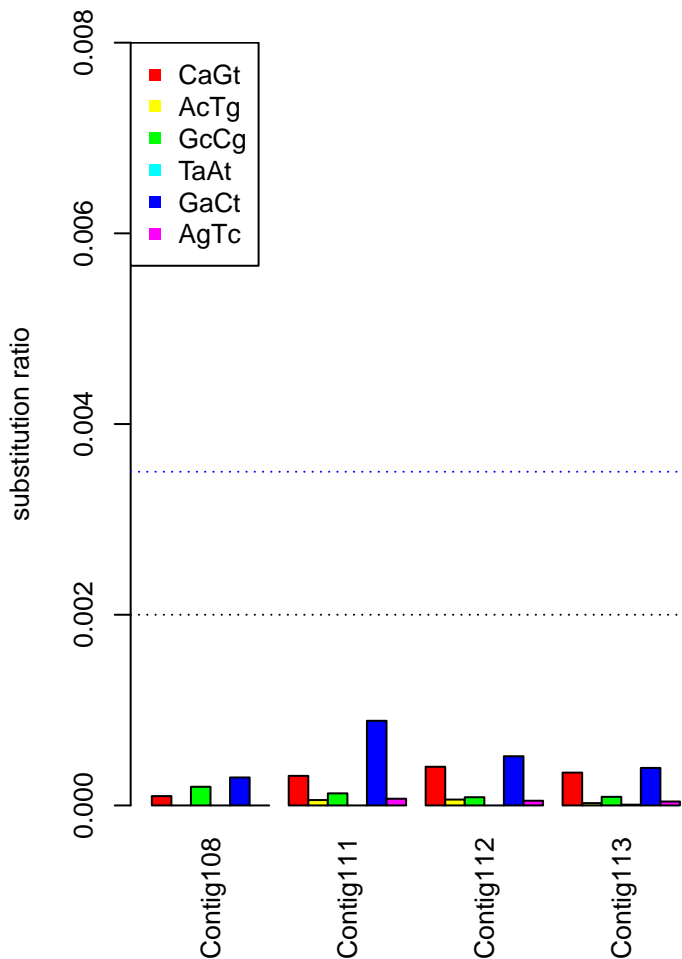

### B aminopeptidases S33

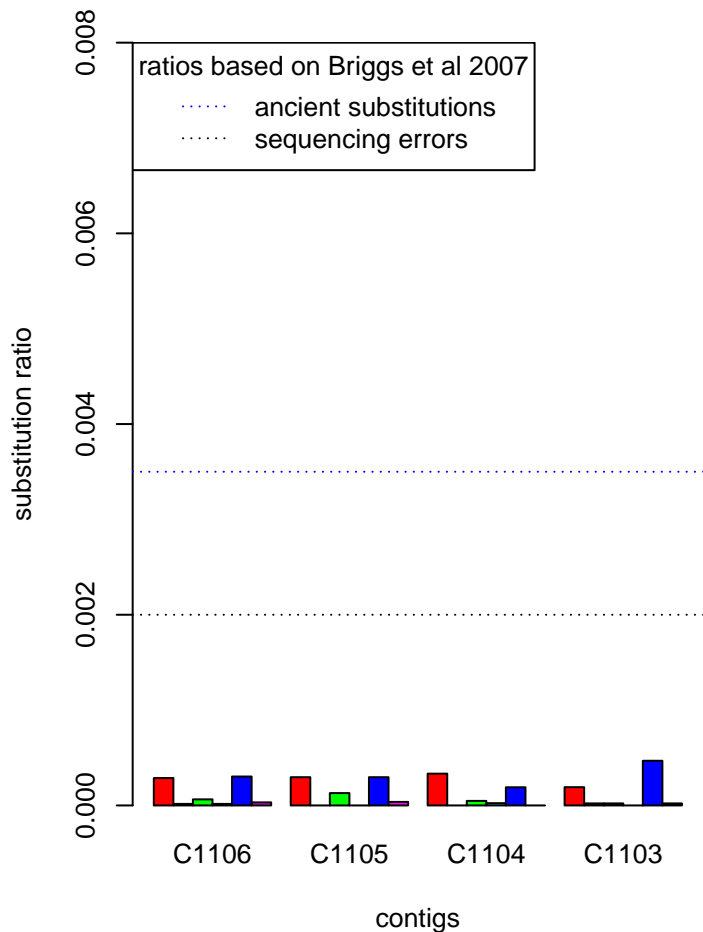

### C Collagenases M09

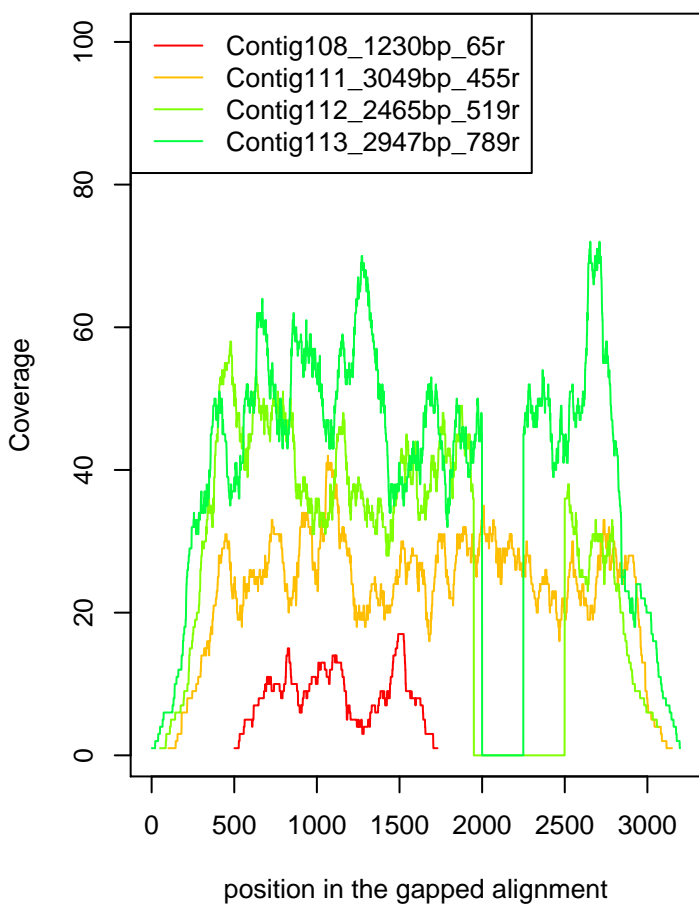

### D Aminopeptidases S33

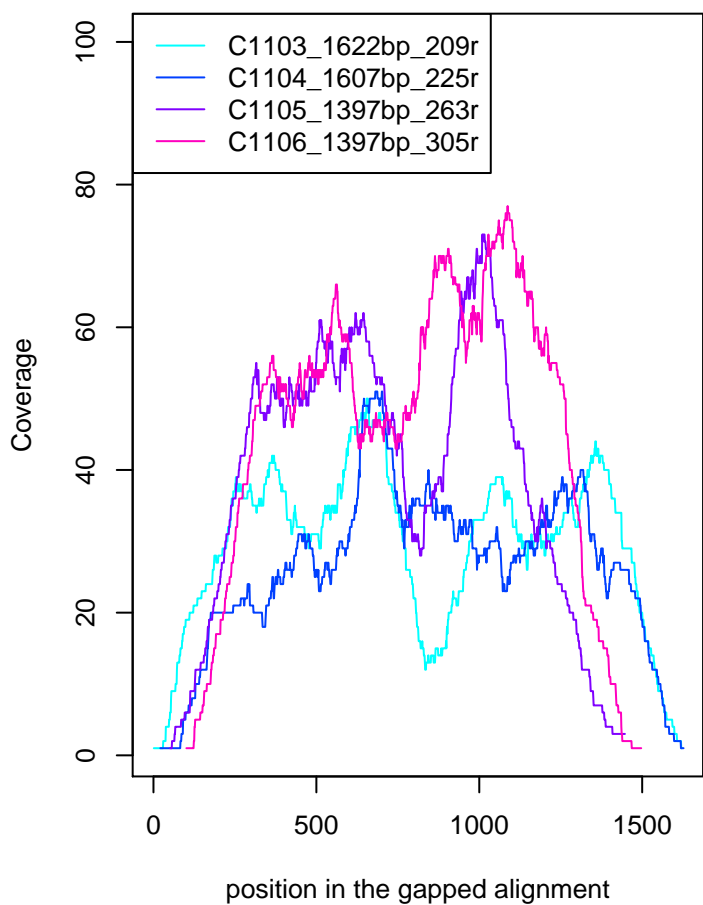

Supplement: pone.0062799.s007.pdf [file pone.0062799.s007.pdf]
